# Supplementary material for: Organ agar serves as physiologically relevant alternative for in vivo bacterial colonization
Source: PubMed Central journal article supplement (PMC10652904; doi:10.1128/iai.00355-23), 2023-10-18
Supplement: iai.00355-23-s0002.pdf [file iai.00355-23-s0002.pdf]

## Supplemental Table S1. Bacterial strains and plasmids

### Bacterial strains used in this study

| Name                    | Selection | Description                                        | Reference  |
|-------------------------|-----------|----------------------------------------------------|------------|
| HI4320                  | tet       | Wild-type clinical isolate of <i>P. mirabilis</i>  | 1          |
| Top 10                  |           | Routine <i>E. coli</i> host for cloning            | Invitrogen |
| PMI0570::kan            | kan       | <i>sucB</i> targetron mutant                       | This study |
| PMI0641::kan            | kan       | <i>sanA</i> targetron mutant                       | This study |
| PMI0711::kan            | kan       | <i>serC</i> targetron mutant                       | This study |
| PMI1545::kan            | kan       | <i>guaA</i> targetron mutant                       | This study |
| PMI2870::kan            | kan       | PMI2870 targetron mutant                           | This study |
| PMI3210::kan            | kan       | <i>glpK</i> targetron mutant                       | This study |
| PMI3457::kan            | kan       | <i>argI</i> targetron mutant                       | This study |
| CFT073                  |           | Wild-type clinical isolate of <i>E. coli</i>       | 2          |
| CFT073 <i>sucB</i> ::Tn | kan       | <i>sucB</i> transposon mutant from ordered library | 3          |
| CFT073 <i>sanA</i> ::Tn | kan       | <i>sanA</i> transposon mutant from ordered library | 3          |
| CFT073 <i>yicH</i> ::Tn | kan       | PMI2870 transposon mutant from ordered library     | 3          |
| CFT073 <i>glpK</i> ::Tn | kan       | <i>glpK</i> transposon mutant from ordered library | 3          |
| CFT073 <i>argI</i> ::Tn | kan       | <i>argI</i> transposon mutant from ordered library | 3          |

### Plasmids used in this study

| Name              | Selection | Description                                                  | Reference       |
|-------------------|-----------|--------------------------------------------------------------|-----------------|
| pAR1219           | amp       | T7 helper plasmid for targetron mutagenesis                  | 4               |
| pACD4K-CloxP-lacZ | chl       | Targetron mutagenesis vector                                 | Millipore Sigma |
| pSNS-2A1          | chl       | pACD4K-CloxP with intron targeting PMI3457 <i>argI</i>       | This study      |
| pSNS-2A2          | chl       | pACD4K-CloxP with intron targeting PMI0570 <i>sucB</i>       | This study      |
| pSNS-2A3          | chl       | pACD4K-CloxP with intron targeting PMI2870                   | This study      |
| pSNS-2A4          | chl       | pACD4K-CloxP with intron targeting PMI3210 <i>glpK</i>       | This study      |
| pSNS-2A5          | chl       | pACD4K-CloxP with intron targeting PMI0641 <i>sanA</i>       | This study      |
| pSNS-2A7          | chl       | pACD4K-CloxP with intron targeting PMI0711 <i>serC</i>       | This study      |
| pSNS-2A8          | chl       | pACD4K-CloxP with intron targeting PMI1545 <i>guaA</i>       | This study      |
| pGEN-MCS          | amp       | Complementation plasmid; stably maintained without selection | 5               |
| <i>guaA</i>       | amp       | promoter                                                     | This study      |
| pGEN- <i>serC</i> | amp       | Complementation of <i>serC</i> under its native promoter     | This study      |
| pGEN- <i>argI</i> | amp       | Complementation of <i>argI</i> under its native promoter     | This study      |

### References

1. Mobley HLT, Warren JW. Urease-positive bacteriuria and obstruction of long-term urinary catheters. *J Clin Microbiol.* 1987;25:2216-7.
2. Mobley HLT, Green DM, Trifillis AL, Johnson DE, Chippendale GR, Lockett CV, Jones BD, Warren JW. Phelonephritogenic *Escherichia coli* and killing of cultured human renal proximal tubular epithelia cells: role of hemolysin in some strains. *Infect Immun.* 1990;58:1281-9.
3. Shea AE, Marzoa J, Himpls SD, Smith SN, Zhao L, Tran L, Mobley HLT. *Escherichia coli* CFT073 fitness factors during urinary tract infection: identification using an ordered transposon library. *Appl Environ Microbiol.* 2020;86(13). Epub 2020/05/03. doi: 10.1128/AEM.00691-20. PubMed PMID: 32358013; PMCID: PMC7301846.
4. Davanloo P, Rosenberg AH, Dunn JJ, Studier FW. Cloning and expression of the gene for bacteriophage T7 RNA polymerase. *Proc Natl Acad Sci U S A.* 1984;81(7):2035-9. Epub 1984/04/01. doi: 10.1073/pnas.81.7.2035. PubMed PMID: 6371808; PMCID: PMC345431.
5. Lane MC, Alteri CJ, Smith SN, Mobley HLT. Expression of flagella is coincident with uropathogenic *Escherichia coli* ascension to the upper urinary tract. *Proc Natl Acad Sci U S A.* 2007;104(42):16669-74.

**Supplemental Table S2. Primers used in this study**

| <b>Name</b>      | <b>Sequence</b>                            | <b>Purpose</b>                                                          |
|------------------|--------------------------------------------|-------------------------------------------------------------------------|
| CP-7             | CCAAGCAGAAGACGGCATAACG                     | transposon outbound primer for confirmation of insertions               |
| PMI0205 Rev      | AGTTTGGTTGTCCCATCGTC                       | PCR confirmation of transposon insertion in PMI0205, paired with CP-7   |
| PMI0206 Rev      | AGATGTGGGGATTGCTAACG                       | PCR confirmation of transposon insertion in PMI0206, paired with CP-7   |
| PMI0570 Rev      | CGTCGTATCTTGTGCAGGTT                       | PCR confirmation of transposon insertion in PMI0570, paired with CP-7   |
| PMI0641 Rev      | TCCATAACGATACGCGATGC                       | PCR confirmation of transposon insertion in PMI0641, paired with CP-7   |
| PMI0711 Rev      | GCCACCATGACAGAACAGAA                       | PCR confirmation of transposon insertion in PMI0711, paired with CP-7   |
| PMI0765 Rev      | TCAAAACGACCGAAACCAGT                       | PCR confirmation of transposon insertion in PMI0765, paired with CP-7   |
| PMI1151 Fwd      | CCGCAATAAACCCCTATCGGC                      | PCR confirmation of transposon insertion in PMI1151, paired with CP-7   |
| PMI1545 Fwd      | GCCGGTATTAGGCATCTGCT                       | PCR confirmation of transposon insertion in PMI1545, paired with CP-7   |
| PMI1833 Fwd      | ATTGCATGGCAGACCGAAGT                       | PCR confirmation of transposon insertion in PMI1833, paired with CP-7   |
| PMI2870 Rev      | GTCTTTGTCTCGCTGTTCCA                       | PCR confirmation of transposon insertion in PMI2870, paired with CP-7   |
| PMI3180 Rev      | TTTGTAAGCGGTTTTGCGTC                       | PCR confirmation of transposon insertion in PMI3180, paired with CP-7   |
| PMI3210 Rev      | GGCACCACCTTAGGTAGCAT                       | PCR confirmation of transposon insertion in PMI3210, paired with CP-7   |
| PMI3301 Fwd      | GTGAGCAGTCAACGACCTGT                       | PCR confirmation of transposon insertion in PMI3301, paired with CP-7   |
| PMI3316 Rev      | CACCAAACGAAACGCAAGAA                       | PCR confirmation of transposon insertion in PMI3316, paired with CP-7   |
| PMI3457 Rev      | AAGGATTTGCTAAGGTCGCC                       | PCR confirmation of transposon insertion in PMI3457, paired with CP-7   |
| PMI3528 Rev      | GGTAGATGCTGGAACCCCTTG                      | PCR confirmation of transposon insertion in PMI3528, paired with CP-7   |
| PMI0006 Fwd      | AGCAGTTGTGATCGCCTAA                        | PCR-confirmed lack of transposon insertion in PMI0006                   |
| PMI0006 Rev      | ATCGCAGGTAAGAGAAGGC                        | PCR-confirmed lack of transposon insertion in PMI0006                   |
| PMI3384 Fwd      | CAAGACGGGAGGTTTACGCT                       | PCR-confirmed lack of transposon insertion in PMI3384                   |
| PMI3384 Rev      | ACCACGCTGTACTIONGACTAT                     | PCR-confirmed lack of transposon insertion in PMI3384                   |
| PMI3431 Fwd      | CGCGGAAAAGAACGGCTAATG                      | PCR-confirmed lack of transposon insertion in PMI3431                   |
| PMI3431 Rev      | GAGGGAATAGCGGTGTAAGC                       | PCR-confirmed lack of transposon insertion in PMI3431                   |
| PMI3538 Fwd      | CCATTTTACCCGATGGGCG                        | PCR-confirmed lack of transposon insertion in PMI3538                   |
| PMI3538 Rev      | TCAACGTGTACTIONCAGCCAC                     | PCR-confirmed lack of transposon insertion in PMI3538                   |
| pACD4K-C-Gib-fwd | TAGGAGAACCTATGGGAAC                        | Amplification of targetron plasmid pACD4K-CloxP for Gibson cloning      |
| pACD4K-C-Gib-rev | CTAGAGGGGAATTGTTATC                        | Amplification of targetron plasmid pACD4K-CloxP for Gibson cloning      |
| intron-Gib-fwd   | ggataacaattcccctctagAAAAAGCTTATAATTATCCTTA | Amplification of targetron synthetic intron fragment for Gibson cloning |
| intron-Gib-rev   | cgttcccataggttctcctaCAGATTGTACAAATGTGGTG   | Amplification of targetron synthetic intron fragment for Gibson cloning |
| PMI0570-TTF      | TTGTGTTAGAAGTACCGGCG                       | PCR confirmation of targetron insertion in PMI0570 <i>sucB</i>          |
| PMI0570-TTR      | GTCGGGCTAAGAGCATCATT                       | PCR confirmation of targetron insertion in PMI0570 <i>sucB</i>          |
| PMI0641-TTF      | GTTTGGGACAGATGGCTTTAC                      | PCR confirmation of targetron insertion in PMI0641 <i>sanA</i>          |
| PMI0641-TTR      | CTAGAAAACGCGGTTACAG                        | PCR confirmation of targetron insertion in PMI0641 <i>sanA</i>          |
| PMI0711-TTF      | TAGGTGAGAAAACCACCGC                        | PCR confirmation of targetron insertion in PMI0711 <i>serC</i>          |

|              |                                                 |                                                                      |
|--------------|-------------------------------------------------|----------------------------------------------------------------------|
| PMI0711-TTR  | AGCAATCCCATCGATAGTCTC                           | PCR confirmation of targetron insertion in PMI0711 <i>serC</i>       |
| PMI1545-TTF  | CGAGAAAGGCTTGAAAACAGA                           | PCR confirmation of targetron insertion in PMI1545 <i>guaA</i>       |
| PMI1545-TTR  | TCTTCGGTAACATCCCATGC                            | PCR confirmation of targetron insertion in PMI1545 <i>guaA</i>       |
| PMI2870-TTF  | CAATGGGGTGCGCAAAAA                              | PCR confirmation of targetron insertion in PMI2870                   |
| PMI2870-TTR  | CAGATGAGACGCCGTAGTAA                            | PCR confirmation of targetron insertion in PMI2870                   |
| PMI3210-TTF  | TGAAACGACTATCGTCTGGG                            | PCR confirmation of targetron insertion in PMI3210 <i>glpK</i>       |
| PMI3210-TTR  | CGCCTTCAACATTATCGAGG                            | PCR confirmation of targetron insertion in PMI3210 <i>glpK</i>       |
| PMI3457-TTF  | AAAAGATTCCACCCGTACCC                            | PCR confirmation of targetron insertion in PMI3457 <i>argI</i>       |
| PMI3457-TTR  | TCAGCATATTTTGCCAGCAT                            | PCR confirmation of targetron insertion in PMI3457 <i>argI</i>       |
| pGEN-GibsonF | AAGATCCCAACGAAAAGC                              | Amplification of complementation plasmid pGEN-MCS for Gibson cloning |
| pGEN-GibsonR | CAAGCTTCATATGCCCGG                              | Amplification of complementation plasmid pGEN-MCS for Gibson cloning |
| PguaBA-GibF  | ccccgggcatatgaagcttgATCAATAAAATTTTCAAAAAAGCTAG  | Amplification of <i>guaBA</i> promoter for Gibson cloning            |
| PguaBA-GibR  | ttgctgtcatagcaatatctcaccaagg                    | Amplification of <i>guaBA</i> promoter for Gibson cloning            |
| guaA-GibF    | agatattgctatgacagcaaatatccataatc                | Amplification of <i>guaA</i> gene for Gibson cloning                 |
| guaA-GibR    | acgctttcgttgggatctttaTTCCCACTCAATCGTTG          | Amplification of <i>guaA</i> gene for Gibson cloning                 |
| serC_GibF    | ccccgggcatatgaagcttgGTTTACAAAAGTCATTGCGCCAATTAG | Amplification of <i>serC</i> and promoter for Gibson cloning         |
| serC_GibR    | acgctttcgttgggatctttaAGCGTGCGGACGCTC            | Amplification of <i>serC</i> and promoter for Gibson cloning         |
| argI_GibF    | ccccgggcatatgaagcttgCAAAAGTGACGTTTAAGG          | Amplification of <i>argI</i> and promoter for Gibson cloning         |
| argI_GibR    | acgctttcgttgggatctttaAAAAGGATTTGCTAAGGTC        | Amplification of <i>argI</i> and promoter for Gibson cloning         |
